# Supplementary material for: Cost-Effectiveness Analysis of Sequential Treatment Strategies for Advanced Melanoma in Real Life in France
Source: MDPI journal article supplement (doi:10.3390/curroncol29120725), 2022-11-27
Supplement: s1 [file s1]

## Supplementary files

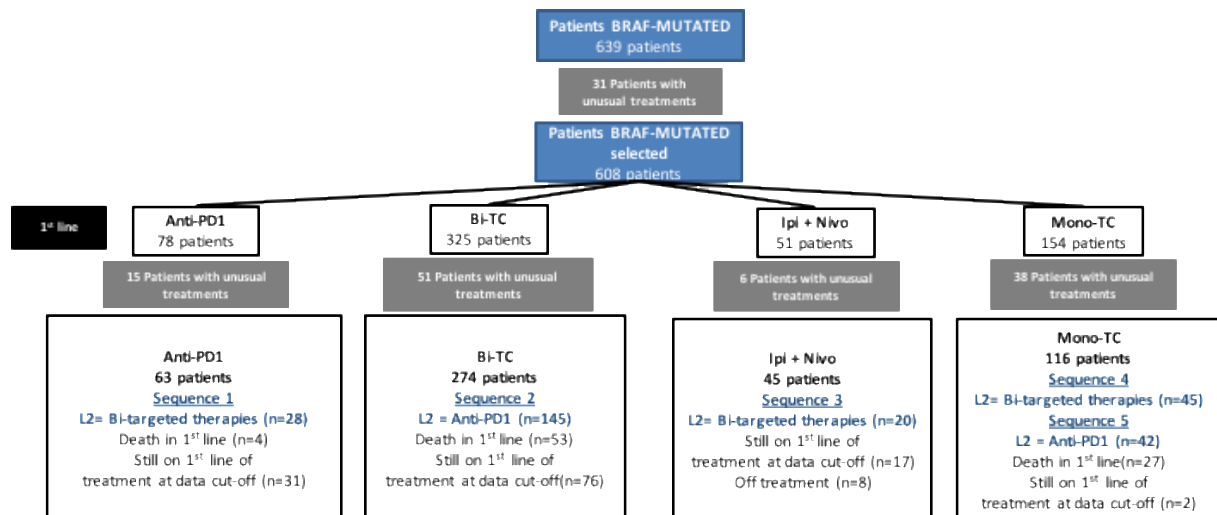

**Figure S1: Flow-chart of BRAF-mutated population from the MelBase cohort**

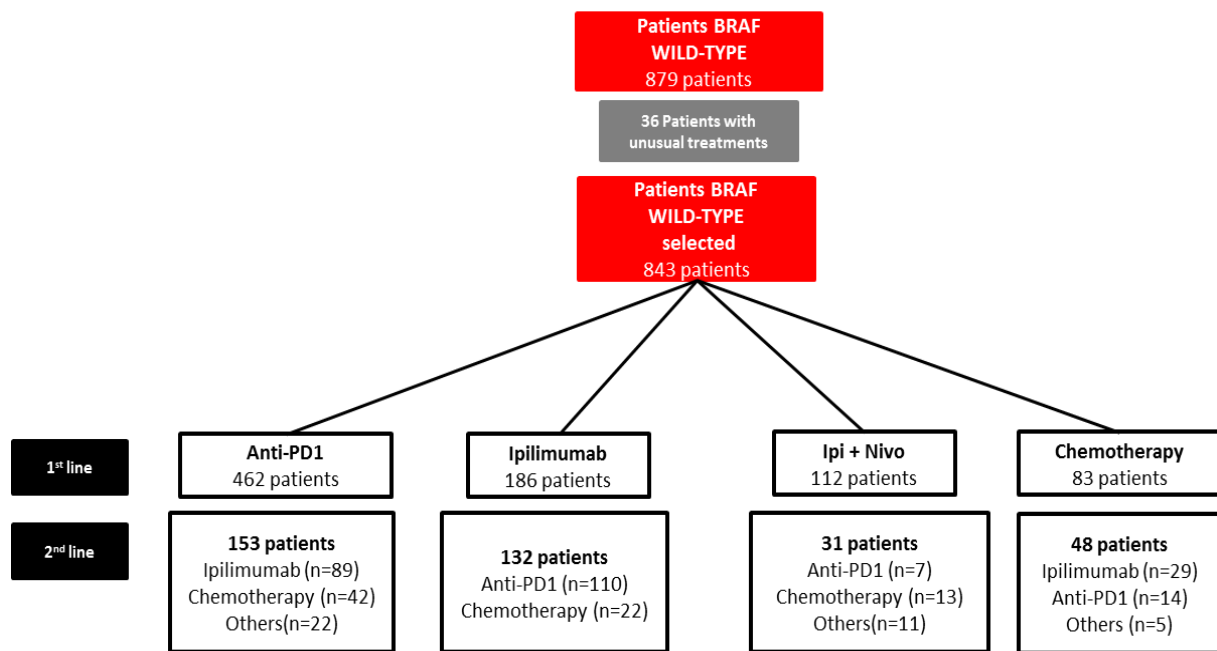

**Figure S2: Flow-chart of BRAF-wild-type population from the MelBase cohort**

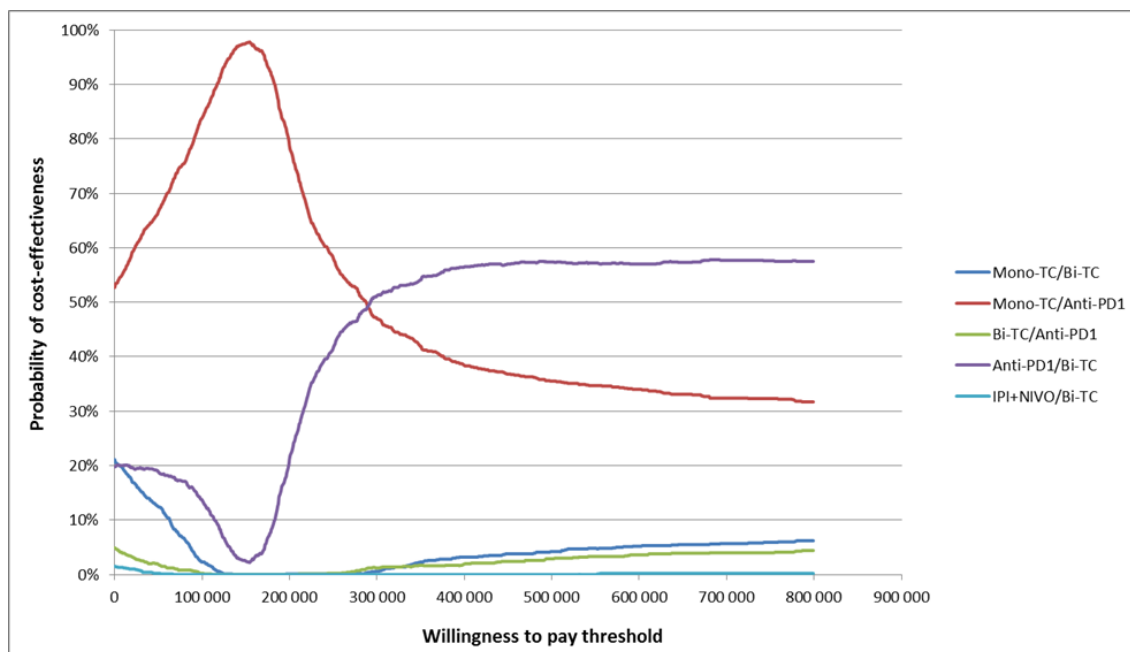

**Figure S3: Cost-effectiveness acceptability curve for BRAF population at 5 years**

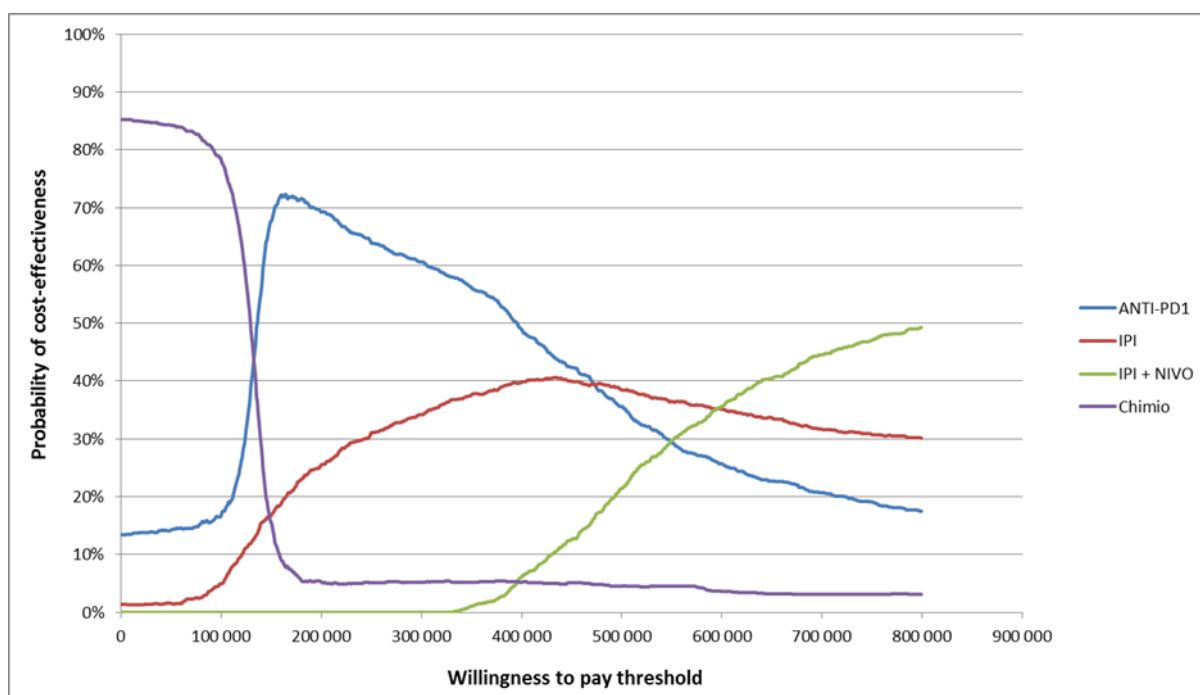

**Figure S4: Cost-effectiveness acceptability curve for Wild-type population at 5 years**

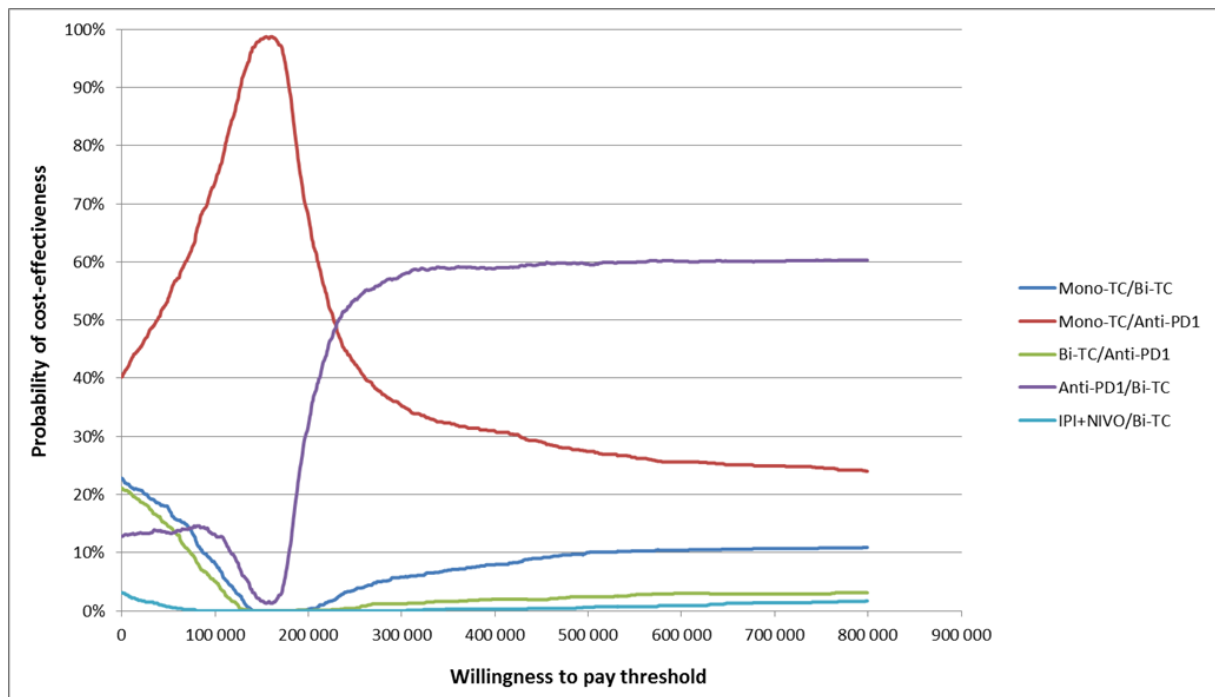

**Figure S5: Cost-effectiveness acceptability curve for BRAF population at 15 years**

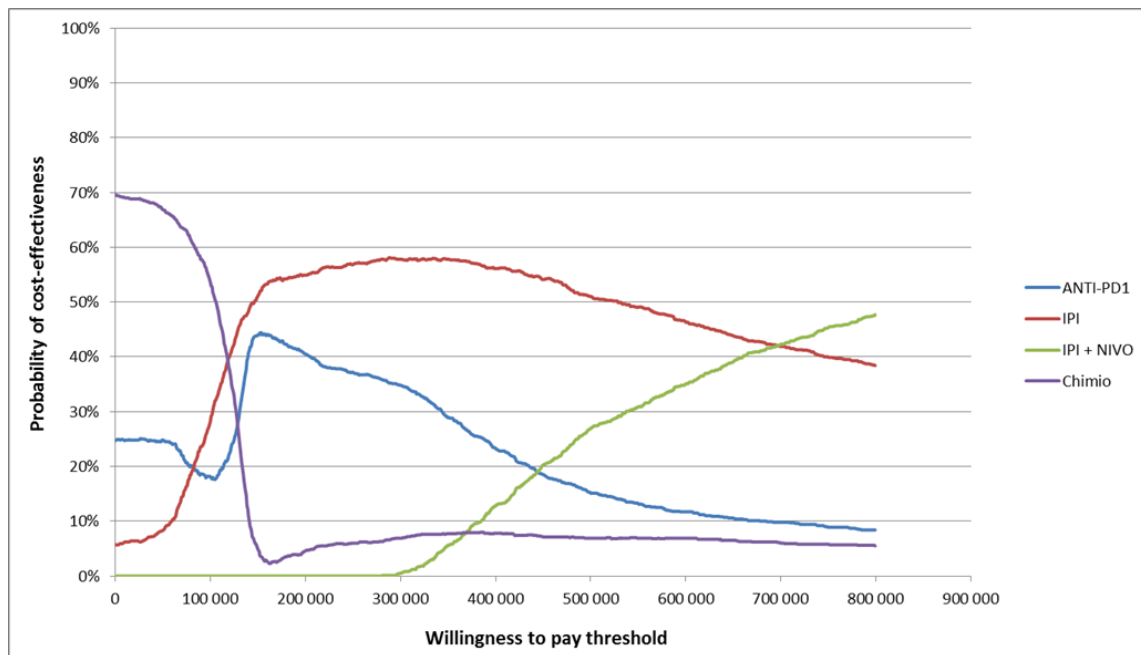

**Figure S6: Cost-effectiveness acceptability curve for Wild-type population at 15 years**

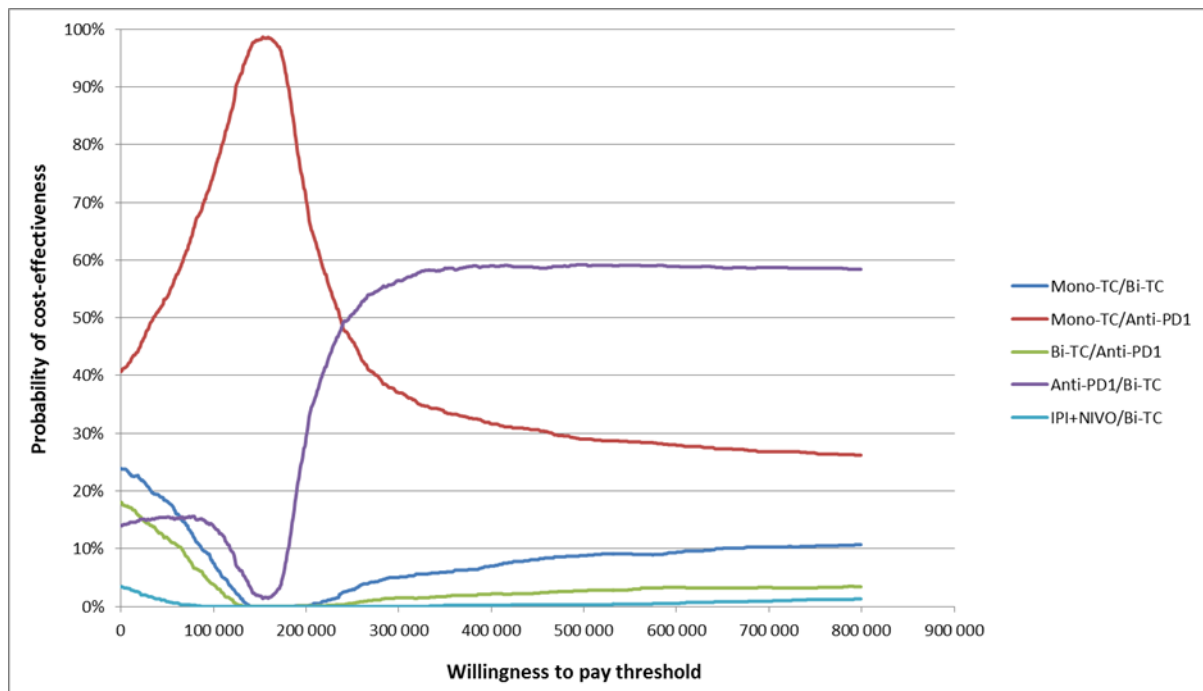

**Figure S7: Cost-effectiveness acceptability curve for BRAF population with a discount rate set at 0%**

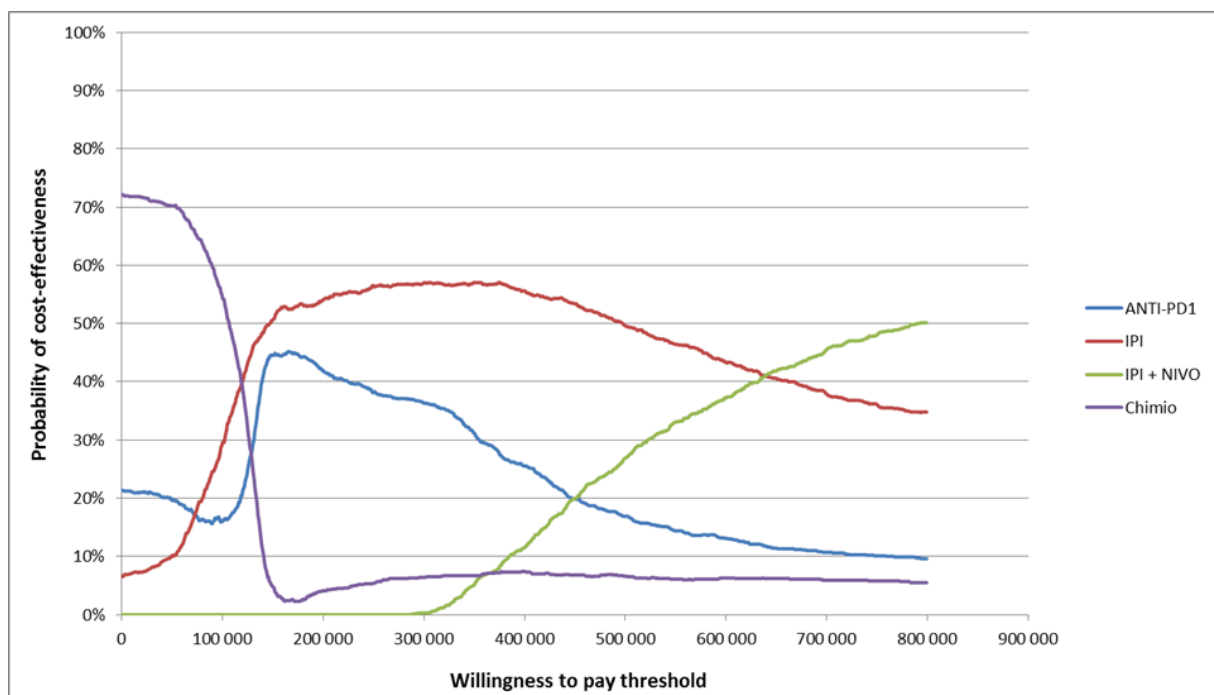

**Figure S8: Cost-effectiveness acceptability curve for Wild-type population with a discount rate set at 0%**

**Table S1: Distribution of the baseline variables in BRAF-mutated population before weighting**

|                                     | Bi-TT//Anti-PD1 | Anti-PD1//Bi-TT |                                   | Ipi+Nivo//Bi-TT |                                   |                                   | Mono-TT//Bi-TT |                                   |                                   |                                   | Mono-TT//Anti-PD1 |                                   |                                   |                                   |                                   |
|-------------------------------------|-----------------|-----------------|-----------------------------------|-----------------|-----------------------------------|-----------------------------------|----------------|-----------------------------------|-----------------------------------|-----------------------------------|-------------------|-----------------------------------|-----------------------------------|-----------------------------------|-----------------------------------|
|                                     | %               | %               | p value vs<br>Bi-TT//<br>Anti-Pd1 | %               | p value vs<br>Bi-TT//<br>Anti-Pd1 | p value vs<br>Anti-Pd1//<br>Bi-TT | %              | p value vs<br>Bi-TT//<br>Anti-Pd1 | p value vs<br>Anti-Pd1//<br>Bi-TT | p value vs<br>Ipi+Nivo//<br>Bi-TT | %                 | p value vs<br>Bi-TT//<br>Anti-Pd1 | p value vs<br>Anti-Pd1//<br>Bi-TT | p value vs<br>Ipi+Nivo//<br>Bi-TT | p value vs<br>Ipi+Nivo//<br>Bi-TT |
| Baseline variables                  |                 |                 |                                   |                 |                                   |                                   |                |                                   |                                   |                                   |                   |                                   |                                   |                                   |                                   |
| Brain metastases                    |                 |                 | 0.11                              |                 | 0.01                              | 0.13                              |                | 0.35                              | 0.42                              | 0.04                              |                   | 0.02                              | 0.61                              | 0.2                               | 0.14                              |
| Absence                             | 0.755           | 0.893           |                                   | 1               |                                   |                                   | 0.822          |                                   |                                   |                                   | 0.929             |                                   |                                   |                                   |                                   |
| Présence                            | 0.245           | 0.107           |                                   | 0               |                                   |                                   | 0.178          |                                   |                                   |                                   | 0.071             |                                   |                                   |                                   |                                   |
| Liver metastases                    |                 |                 | 0.15                              |                 | 0.1                               | 0.02                              |                | 0.14                              | 0.82                              | 0.02                              |                   | 0.34                              | 0.56                              | 0.05                              | 0.67                              |
| Absence                             | 0.685           | 0.821           |                                   | 5               |                                   |                                   | 0.8            |                                   |                                   |                                   | 0.762             |                                   |                                   |                                   |                                   |
| Présence                            | 0.315           | 0.179           |                                   | 0.5             |                                   |                                   | 0.2            |                                   |                                   |                                   | 0.238             |                                   |                                   |                                   |                                   |
| Elevated LDH                        |                 |                 | 0.09                              |                 | 0.001                             | 0.12                              |                | 0.31                              | 0.04                              | 0.001                             |                   | 0.69                              | 0.28                              | 0.009                             | 0.25                              |
| No                                  | 0.699           | 0.536           |                                   | 0.3             |                                   |                                   | 0.778          |                                   |                                   |                                   | 0.667             |                                   |                                   |                                   |                                   |
| Yes                                 | 0.301           | 0.464           |                                   | 0.7             |                                   |                                   | 0.222          |                                   |                                   |                                   | 0.333             |                                   |                                   |                                   |                                   |
| ECOG                                |                 |                 | 0.55                              |                 | 0.88                              | 0.77                              |                | 0.03                              | 0.21                              | 0.2                               |                   | 0.48                              | 0.81                              | 0.65                              | 0.38                              |
| 0 (=0,1)                            | 0.86            | 0.857           |                                   | 0.9             |                                   |                                   | 0.689          |                                   |                                   |                                   | 0.81              |                                   |                                   |                                   |                                   |
| 1 (=2,3,4)                          | 0.077           | 0.036           |                                   | 0.05            |                                   |                                   | 0.156          |                                   |                                   |                                   | 0.071             |                                   |                                   |                                   |                                   |
| Unknown                             | 0.063           | 0.107           |                                   | 0.05            |                                   |                                   | 0.156          |                                   |                                   |                                   | 0.119             |                                   |                                   |                                   |                                   |
| Metastatic status                   |                 |                 | 0.07                              |                 | 0.93                              | 0.23                              |                | 0.6                               | 0.48                              | 0.71                              |                   | 0.1                               | 0.43                              | 0.25                              | 0.33                              |
| 0 (IIIC, M1a, M1b)                  | 0.28            | 0.5             |                                   | 0.25            |                                   |                                   | 0.356          |                                   |                                   |                                   | 0.405             |                                   |                                   |                                   |                                   |
| 1 (M1c)                             | 0.657           | 0.464           |                                   | 0.7             |                                   |                                   | 0.6            |                                   |                                   |                                   | 0.476             |                                   |                                   |                                   |                                   |
| Unknown                             | 0.063           | 0.036           |                                   | 0.05            |                                   |                                   | 0.044          |                                   |                                   |                                   | 0.119             |                                   |                                   |                                   |                                   |
| High neutrophil to lymphocyte ratio |                 |                 | 0.06                              |                 | 0.91                              | 0.05                              |                | 0.24                              | 0.3                               | 0.21                              |                   | 0.14                              | 0.46                              | 0.13                              | 0.74                              |
| Yes                                 | 0.622           | 0.857           |                                   | 0.6             |                                   |                                   | 0.756          |                                   |                                   |                                   | 0.786             |                                   |                                   |                                   |                                   |
| No                                  | 0.371           | 0.143           |                                   | 0.4             |                                   |                                   | 0.244          |                                   |                                   |                                   | 0.214             |                                   |                                   |                                   |                                   |
| Mutation V600E                      |                 |                 | 0.87                              |                 | 0.09                              | 0.02                              |                | 0.75                              | 0.53                              | 0.06                              |                   | 0.006                             | 0.7                               | 0.001                             | 0.006                             |
| Yes                                 | 0.189           | 0.214           |                                   | 0               |                                   |                                   | 0.156          |                                   |                                   |                                   | 0.429             |                                   |                                   |                                   |                                   |
| No                                  | 0.804           | 0.786           |                                   | 1               |                                   |                                   | 0.844          |                                   |                                   |                                   | 0.571             |                                   |                                   |                                   |                                   |
| Age                                 |                 |                 | 0.51                              |                 | 0.11                              | 0.08                              |                | 0.95                              | 0.61                              | 0.14                              |                   | 0.96                              | 0.62                              | 0.14                              | 1                                 |
| <65                                 | 0.671           | 0.607           |                                   | 0.85            |                                   |                                   | 0.667          |                                   |                                   |                                   | 0.667             |                                   |                                   |                                   |                                   |
| >65                                 | 0.329           | 0.393           |                                   | 0.15            |                                   |                                   | 0.333          |                                   |                                   |                                   | 0.333             |                                   |                                   |                                   |                                   |
| Anatomic location                   |                 |                 | 0.52                              |                 | 0.67                              | NA                                |                | 0.89                              | 0.35                              | NA                                |                   | 0.71                              | 0.54                              | 0.46                              | 0.62                              |
| Upper and lower extremities         | 0.259           | 0.286           |                                   | 0.15            |                                   |                                   | 0.2            |                                   |                                   |                                   | 0.286             |                                   |                                   |                                   |                                   |
| Trunk                               | 0.441           | 0.464           |                                   | 0.55            |                                   |                                   | 0.444          |                                   |                                   |                                   | 0.333             |                                   |                                   |                                   |                                   |
| Head and neck                       | 0.119           | 0.179           |                                   | 0.2             |                                   |                                   | 0.156          |                                   |                                   |                                   | 0.143             |                                   |                                   |                                   |                                   |
| Acral lentiginous                   | 0.021           | 0               |                                   | 0               |                                   |                                   | 0.022          |                                   |                                   |                                   | 0.024             |                                   |                                   |                                   |                                   |
| Mucosa                              | 0.014           | 0.036           |                                   | 0               |                                   |                                   | 0              |                                   |                                   |                                   | 0.048             |                                   |                                   |                                   |                                   |
| Unknown                             | 0.147           | 0.036           |                                   | 0.1             |                                   |                                   | 0.178          |                                   |                                   |                                   | 0.167             |                                   |                                   |                                   |                                   |
| BMI                                 |                 |                 | 0.57                              |                 | 0.91                              | 0.61                              |                | 0.87                              | 0.54                              | 1                                 |                   | 0.5                               | 1                                 | 0.57                              | 0.49                              |
| <18,5                               | 0.811           | 0.857           |                                   | 0.8             |                                   |                                   | 0.8            |                                   |                                   |                                   | 0.857             |                                   |                                   |                                   |                                   |
| 18.5<=BMI<25.0                      | 0.189           | 0.143           |                                   | 0.2             |                                   |                                   | 0.2            |                                   |                                   |                                   | 0.143             |                                   |                                   |                                   |                                   |

**Table S2: Distribution of baseline variables in BRAF-mutated population after weighting**

|                                            | Bi-TT//Anti-PD1 | Anti-PD1//Bi-TT |                                   | Ipi+Nivo//Bi-TT |                                   |                                   | Mono-TT//Bi-TT |                                   |                                   |                                   | Mono-TT//Anti-PD1 |                                   |                                   |                                   |                                   |
|--------------------------------------------|-----------------|-----------------|-----------------------------------|-----------------|-----------------------------------|-----------------------------------|----------------|-----------------------------------|-----------------------------------|-----------------------------------|-------------------|-----------------------------------|-----------------------------------|-----------------------------------|-----------------------------------|
| Baseline variables                         | %               | %               | p value vs<br>Bi-TT//<br>Anti-Pd1 | %               | p value vs<br>Bi-TT//<br>Anti-Pd1 | p value vs<br>Anti-Pd1//<br>Bi-TT | %              | p value vs<br>Bi-TT//<br>Anti-Pd1 | p value vs<br>Anti-Pd1//<br>Bi-TT | p value vs<br>Ipi+Nivo//<br>Bi-TT | %                 | p value vs<br>Bi-TT//<br>Anti-Pd1 | p value vs<br>Anti-Pd1//<br>Bi-TT | p value vs<br>Ipi+Nivo//<br>Bi-TT | p value vs<br>Ipi+Nivo//<br>Bi-TT |
| <b>Brain metastases</b>                    |                 |                 | 0.92                              |                 | 0.05                              | 0.36                              |                | 0.47                              | 0.68                              | 0.32                              |                   | 0.54                              | 0.59                              | 0.12                              | 0.32                              |
| Absence                                    | 0.783           | 0.796           |                                   | 1               |                                   |                                   | 0.851          |                                   |                                   |                                   | 0.685             |                                   |                                   |                                   |                                   |
| Présence                                   | 0.217           | 0.204           |                                   | 0               |                                   |                                   | 0.149          |                                   |                                   |                                   | 0.315             |                                   |                                   |                                   |                                   |
| <b>Liver metastases</b>                    |                 |                 | 0.78                              |                 | 0.42                              | 0.43                              |                | 0.63                              | 0.57                              | 0.83                              |                   | 0.15                              | 0.49                              | 0.09                              | 0.17                              |
| Absence                                    | 0.711           | 0.748           |                                   | 0.608           |                                   |                                   | 0.647          |                                   |                                   |                                   | 0.836             |                                   |                                   |                                   |                                   |
| Présence                                   | 0.289           | 0.252           |                                   | 0.392           |                                   |                                   | 0.353          |                                   |                                   |                                   | 0.164             |                                   |                                   |                                   |                                   |
| <b>Elevated LDH</b>                        |                 |                 | 0.31                              |                 | 0.09                              | 0.57                              |                | 0.42                              | 0.16                              | 0.05                              |                   | 0.65                              | 0.25                              | 0.09                              | 0.78                              |
| No                                         | 0.728           | 0.603           |                                   | 0.495           |                                   |                                   | 0.803          |                                   |                                   |                                   | 0.772             |                                   |                                   |                                   |                                   |
| Yes                                        | 0.272           | 0.397           |                                   | 0.505           |                                   |                                   | 0.197          |                                   |                                   |                                   | 0.228             |                                   |                                   |                                   |                                   |
| <b>ECOG</b>                                |                 |                 | 0.58                              |                 | 0.26                              | 0.1                               |                | 0.52                              | 0.98                              | 0.08                              |                   | 0.86                              | 0.69                              | 0.32                              | 0.69                              |
| 0 (=0,1)                                   | 0.868           | 0.765           |                                   | 0.957           |                                   |                                   | 0.792          |                                   |                                   |                                   | 0.864             |                                   |                                   |                                   |                                   |
| 1 (=2,3,4)                                 | 0.074           | 0.113           |                                   | 0.023           |                                   |                                   | 0.104          |                                   |                                   |                                   | 0.059             |                                   |                                   |                                   |                                   |
| Unknown                                    | 0.058           | 0.122           |                                   | 0.02            |                                   |                                   | 0.104          |                                   |                                   |                                   | 0.077             |                                   |                                   |                                   |                                   |
| <b>Metastatic status</b>                   |                 |                 | 0.96                              |                 | 0.56                              | 0.74                              |                | 0.86                              | 0.97                              | 0.83                              |                   | 0.83                              | 0.94                              | 0.5                               | 0.79                              |
| 0 (IIIC, M1a, M1b)                         | 0.302           | 0.286           |                                   | 0.18            |                                   |                                   | 0.253          |                                   |                                   |                                   | 0.333             |                                   |                                   |                                   |                                   |
| 1 (M1c)                                    | 0.645           | 0.645           |                                   | 0.761           |                                   |                                   | 0.679          |                                   |                                   |                                   | 0.596             |                                   |                                   |                                   |                                   |
| Unknown                                    |                 |                 |                                   |                 |                                   |                                   |                |                                   |                                   |                                   |                   |                                   |                                   |                                   |                                   |
| <b>High neutrophil to lymphocyte ratio</b> |                 |                 | 0.43                              |                 | 0.87                              | 0.63                              |                | 0.8                               | 0.44                              | 0.75                              |                   | 0.09                              | 0.47                              | 0.15                              | 0.06                              |
| Yes                                        | 0.691           | 0.813           |                                   | 0.741           |                                   |                                   | 0.696          |                                   |                                   |                                   | 0.887             |                                   |                                   |                                   |                                   |
| No                                         | 0.298           | 0.187           |                                   | 0.259           |                                   |                                   | 0.304          |                                   |                                   |                                   | 0.113             |                                   |                                   |                                   |                                   |
| <b>Mutation V600E</b>                      |                 |                 | 0.24                              |                 | 0.26                              | 0.18                              |                | 0.24                              | 0.96                              | 0.11                              |                   | 0.02                              | 0.4                               | 0.007                             | 0.43                              |
| Yes                                        | 0.167           | 0.316           |                                   | 0               |                                   |                                   | 0.325          |                                   |                                   |                                   | 0.481             |                                   |                                   |                                   |                                   |
| No                                         | 0.822           | 0.684           |                                   | 1               |                                   |                                   | 0.675          |                                   |                                   |                                   | 0.519             |                                   |                                   |                                   |                                   |
| <b>Age</b>                                 |                 |                 | 0.61                              |                 | 0.08                              | 0.07                              |                | 0.36                              | 0.77                              | 0.03                              |                   | 0.29                              | 0.24                              | 0.41                              | 0.13                              |
| <65                                        | 0.667           | 0.602           |                                   | 0.867           |                                   |                                   | 0.552          |                                   |                                   |                                   | 0.771             |                                   |                                   |                                   |                                   |
| >65                                        | 0.333           | 0.398           |                                   | 0.133           |                                   |                                   | 0.448          |                                   |                                   |                                   | 0.229             |                                   |                                   |                                   |                                   |
| <b>Anatomic location</b>                   |                 |                 | 0.27                              |                 | 0.75                              | NA                                |                | 0.43                              | 0.38                              | NA                                |                   | 0.93                              | 0.43                              | 0.75                              | 0.36                              |
| Upper and lower extremities                | 0.252           | 0.365           |                                   | 0.177           |                                   |                                   | 0.292          |                                   |                                   |                                   | 0.224             |                                   |                                   |                                   |                                   |
| Trunk                                      | 0.46            | 0.371           |                                   | 0.608           |                                   |                                   | 0.319          |                                   |                                   |                                   | 0.533             |                                   |                                   |                                   |                                   |
| Head and neck                              | 0.105           | 0.083           |                                   | 0.147           |                                   |                                   | 0.081          |                                   |                                   |                                   | 0.072             |                                   |                                   |                                   |                                   |
| Acral lentiginous                          | 0.019           | 0               |                                   | 0               |                                   |                                   | 0.016          |                                   |                                   |                                   | 0.011             |                                   |                                   |                                   |                                   |
| Mucosa                                     | 0.014           | 0.113           |                                   | 0               |                                   |                                   | 0              |                                   |                                   |                                   | 0.019             |                                   |                                   |                                   |                                   |
| Unknown                                    | 0.149           | 0.069           |                                   | 0.069           |                                   |                                   | 0.293          |                                   |                                   |                                   | 0.14              |                                   |                                   |                                   |                                   |
| <b>BMI</b>                                 |                 |                 | 0.63                              |                 | 0.97                              | 0.69                              |                | 0.16                              | 0.54                              | 0.28                              |                   | 0.49                              | 0.38                              | 0.64                              | 0.1                               |
| <18,5                                      | 0.829           | 0.775           |                                   | 0.833           |                                   |                                   | 0.667          |                                   |                                   |                                   | 0.879             |                                   |                                   |                                   |                                   |
| 18.5<=BMI<25.0                             | 0.171           | 0.225           |                                   | 0.167           |                                   |                                   | 0.333          |                                   |                                   |                                   | 0.121             |                                   |                                   |                                   |                                   |

**Table S3: Distribution of baseline variables in BRAF Wild-type population before weighting**

|                                     | Anti-PD1 | Ipilimumab |                     | Ipilimumab + Nivolumab |                     |                       | Chimiothérapie |                     |                       |                                  |
|-------------------------------------|----------|------------|---------------------|------------------------|---------------------|-----------------------|----------------|---------------------|-----------------------|----------------------------------|
| Baseline variables                  | %        | %          | p value VS Anti-PD1 | %                      | p value VS Anti-PD1 | p value VS Ipilimumab | %              | p value VS Anti-PD1 | p value VS Ipilimumab | p value VS Ipilimumab +Nivolumab |
| Brain metastases                    |          |            | 0.32                |                        | 0.06                | 0.3                   |                | 0.32                | 0.11                  | 0.02                             |
| Absence                             | 0.84     | 0.87       |                     | 0.911                  |                     |                       | 0.795          |                     |                       |                                  |
| Présence                            | 0.16     | 0.129      |                     | 0.089                  |                     |                       | 0.205          |                     |                       |                                  |
| Liver metastases                    |          |            | 0.76                |                        | 0.002               | 0.01                  |                | 0.42                | 0.61                  | 0.12                             |
| Absence                             | 0.76     | 0.753      |                     | 0.616                  |                     |                       | 0.723          |                     |                       |                                  |
| Présence                            | 0.24     | 0.247      |                     | 0.384                  |                     |                       | 0.277          |                     |                       |                                  |
| Elevated LDH                        |          |            | 0.64                |                        | 0.14                | 0.07                  |                | 0.83                | 0.8                   | 0.21                             |
| No                                  | 0.712    | 0.726      |                     | 0.625                  |                     |                       | 0.711          |                     |                       |                                  |
| Yes                                 | 0.284    | 0.274      |                     | 0.375                  |                     |                       | 0.289          |                     |                       |                                  |
| ECOG                                |          |            | 0.17                |                        | 0.14                | 0.35                  |                | 0                   | 0.001                 | 0.12                             |
| 0 (=0,1)                            | 0.827    | 0.828      |                     | 0.786                  |                     |                       | 0.663          |                     |                       |                                  |
| 1 (=2,3,4)                          | 0.059    | 0.054      |                     | 0.098                  |                     |                       | 0.193          |                     |                       |                                  |
| Unknown                             | 0.114    | 0.118      |                     | 0.116                  |                     |                       | 0.145          |                     |                       |                                  |
| Metastatic status                   |          |            | 0.1                 |                        | 0.68                | 0.04                  |                | 0.13                | 0.08                  | 0.17                             |
| 0 (IIIC, M1a, M1b)                  | 0.437    | 0.478      |                     | 0.42                   |                     |                       | 0.337          |                     |                       |                                  |
| 1 (M1c)                             | 0.519    | 0.511      |                     | 0.518                  |                     |                       | 0.639          |                     |                       |                                  |
| Unknown                             | 0.043    | 0.011      |                     | 0.062                  |                     |                       | 0.024          |                     |                       |                                  |
| High neutrophil to lymphocyte ratio |          |            | 0.43                |                        | 0.6                 | 0.92                  |                | 0.003               | 0.05                  | 0.05                             |
| Yes                                 | 0.743    | 0.72       |                     | 0.741                  |                     |                       | 0.59           |                     |                       |                                  |
| No                                  | 0.238    | 0.269      |                     | 0.25                   |                     |                       | 0.41           |                     |                       |                                  |
| Age                                 |          |            | 0.006               |                        | 0                   | 0.07                  |                | 0.04                | 0                     | 0                                |
| <65                                 | 0.305    | 0.419      |                     | 0.527                  |                     |                       | 0.193          |                     |                       |                                  |
| >65                                 | 0.695    | 0.581      |                     | 0.473                  |                     |                       | 0.807          |                     |                       |                                  |
| Anatomic location                   |          |            | 0.02                |                        | 0.69                | 0.008                 |                | 0.6                 | 0.26                  | 0.36                             |
| Upper and lower extremities         | 0.286    | 0.344      |                     | 0.241                  |                     |                       | 0.386          |                     |                       |                                  |
| Trunk                               | 0.194    | 0.194      |                     | 0.214                  |                     |                       | 0.193          |                     |                       |                                  |
| Head and neck                       | 0.172    | 0.118      |                     | 0.152                  |                     |                       | 0.12           |                     |                       |                                  |
| Acral lentiginous                   | 0.098    | 0.167      |                     | 0.08                   |                     |                       | 0.06           |                     |                       |                                  |
| Mucosa                              | 0.113    | 0.059      |                     | 0.17                   |                     |                       | 0.096          |                     |                       |                                  |
| Unknown                             | 0.128    | 0.118      |                     | 0.134                  |                     |                       | 0.145          |                     |                       |                                  |
| BMI                                 |          |            | 0.38                |                        | 0.51                | 0.95                  |                | 0.25                | 0.63                  | 0.62                             |
| <18,5                               | 0.775    | 0.806      |                     | 0.804                  |                     |                       | 0.831          |                     |                       |                                  |
| 18.5<=BMI<25.0                      | 0.225    | 0.194      |                     | 0.196                  |                     |                       | 0.169          |                     |                       |                                  |

**Table A4: Distribution of the baseline variables in BRAF-Wild-type population after weighting**

|                                     | Anti-PD1 |       | Ipilimumab          |       | Ipilimumab + Nivolumab |                       |       | Chimiothérapie      |                       |                                   |  |
|-------------------------------------|----------|-------|---------------------|-------|------------------------|-----------------------|-------|---------------------|-----------------------|-----------------------------------|--|
| Baseline variables                  | %        | %     | p value VS Anti-PD1 | %     | p value VS Anti-PD1    | p value VS Ipilimumab | %     | p value VS Anti-PD1 | p value VS Ipilimumab | p value VS Ipilimumab + Nivolumab |  |
| Brain metastases                    |          |       | 0.54                |       | 0.21                   | 0.54                  |       | 0.2                 | 0.64                  | 0.82                              |  |
| Absence                             | 0.868    | 0.893 |                     | 0.919 |                        |                       | 0.91  |                     |                       |                                   |  |
| Présence                            | 0.132    | 0.107 |                     | 0.081 |                        |                       | 0.09  |                     |                       |                                   |  |
| Liver metastases                    |          |       | 0.26                |       | 0.61                   | 0.65                  |       | 0.93                | 0.4                   | 0.67                              |  |
| Absence                             | 0.75     | 0.805 |                     | 0.778 |                        |                       | 0.744 |                     |                       |                                   |  |
| Présence                            | 0.25     | 0.195 |                     | 0.222 |                        |                       | 0.256 |                     |                       |                                   |  |
| Elevated LDH                        |          |       | 0.37                |       | 0.65                   | 0.71                  |       | 0.36                | 0.83                  | 0.6                               |  |
| No                                  | 0.71     | 0.764 |                     | 0.736 |                        |                       | 0.78  |                     |                       |                                   |  |
| Yes                                 | 0.286    | 0.236 |                     | 0.264 |                        |                       | 0.22  |                     |                       |                                   |  |
| ECOG                                |          |       | 0.54                |       | 0.41                   | 0.2                   |       | 0.77                | 0.34                  | 0.63                              |  |
| 0 (=0,1)                            | 0.827    | 0.796 |                     | 0.878 |                        |                       | 0.838 |                     |                       |                                   |  |
| 1 (=2,3,4)                          | 0.059    | 0.041 |                     | 0.048 |                        |                       | 0.069 |                     |                       |                                   |  |
| Unknown                             | 0.114    | 0.163 |                     | 0.073 |                        |                       | 0.092 |                     |                       |                                   |  |
| Metastatic status                   |          |       | 0.26                |       | 0.92                   | 0.31                  |       | 0.39                | 0.55                  | 0.44                              |  |
| 0 (IIIC, M1a, M1b)                  | 0.47     | 0.548 |                     | 0.453 |                        |                       | 0.466 |                     |                       |                                   |  |
| 1 (M1c)                             | 0.493    | 0.443 |                     | 0.503 |                        |                       | 0.525 |                     |                       |                                   |  |
| Unknown                             | 0.037    | 0.01  |                     | 0.044 |                        |                       | 0.009 |                     |                       |                                   |  |
| High neutrophil to lymphocyte ratio |          |       | 0.49                |       | 0.35                   | 0.61                  |       | 0.13                | 0.14                  | 0.09                              |  |
| Yes                                 | 0.743    | 0.781 |                     | 0.821 |                        |                       | 0.673 |                     |                       |                                   |  |
| No                                  | 0.238    | 0.211 |                     | 0.164 |                        |                       | 0.327 |                     |                       |                                   |  |
| Age                                 |          |       | 0.52                |       | 0.74                   | 0.44                  |       | 0.25                | 0.16                  | 0.44                              |  |
| <65                                 | 0.337    | 0.387 |                     | 0.315 |                        |                       | 0.245 |                     |                       |                                   |  |
| >65                                 | 0.663    | 0.613 |                     | 0.685 |                        |                       | 0.755 |                     |                       |                                   |  |
| Anatomic location                   |          |       | 0.01                |       | 0.84                   | 0.06                  |       | 0.82                | 0.16                  | 0.99                              |  |
| Upper and lower extremities         | 0.286    | 0.284 |                     | 0.352 |                        |                       | 0.337 |                     |                       |                                   |  |
| Trunk                               | 0.194    | 0.18  |                     | 0.199 |                        |                       | 0.24  |                     |                       |                                   |  |
| Head and neck                       | 0.172    | 0.1   |                     | 0.141 |                        |                       | 0.112 |                     |                       |                                   |  |
| Acral lentiginous                   | 0.098    | 0.277 |                     | 0.08  |                        |                       | 0.081 |                     |                       |                                   |  |
| Mucosa                              | 0.113    | 0.059 |                     | 0.135 |                        |                       | 0.128 |                     |                       |                                   |  |
| Unknown                             | 0.128    | 0.101 |                     | 0.085 |                        |                       | 0.102 |                     |                       |                                   |  |
| BMI                                 |          |       | 0.42                |       | 0.47                   | 0.99                  |       | 0.8                 | 0.48                  | 0.5                               |  |
| <18,5                               | 0.794    | 0.829 |                     | 0.83  |                        |                       | 0.776 |                     |                       |                                   |  |
| 18.5<=BMI<25.0                      | 0.206    | 0.171 |                     | 0.17  |                        |                       | 0.224 |                     |                       |                                   |  |



**Table S5: Extrapolated life expectancy and cost per patient from the multistate model (MSM) at 5 years**

|                                           | Sequence                                      | Mean time spent<br>in 1 <sup>st</sup> line<br>([CI <sub>95%</sub> ], (month,<br>years)) | Mean time spent<br>in subsequent lines<br>([CI <sub>95%</sub> ], (month,<br>years)) | Mean survival time<br>([CI <sub>95%</sub> ], (month,<br>years)) | Mean<br>QALYs <sup>3</sup><br>[CI <sub>95%</sub> ] | Mean total cost<br>per patient<br>[CI <sub>95%</sub> ], (€) | Sequence    |
|-------------------------------------------|-----------------------------------------------|-----------------------------------------------------------------------------------------|-------------------------------------------------------------------------------------|-----------------------------------------------------------------|----------------------------------------------------|-------------------------------------------------------------|-------------|
| <b>BRAF mutated<br/>Population</b>        | <b>Mono-TT<sup>1</sup> → Anti-PD1</b>         | 19,1 [12.4-29.7]<br>1,6 [1.0-2.5]                                                       | 11,9 [4.9-21.8]<br>1,0 [0.4-1.8]                                                    | 31,0 [22.4-43.1]<br>2,6 [1.9-3.6]                               | 1,9 [1.4-2.7]                                      | 287 438<br>[206 761-398 575]                                | 28% [14-58] |
|                                           | <b>Mono-TT<sup>1</sup>→ Bi-TT<sup>2</sup></b> | 11,1 [6.8-21.3]<br>0,9 [0.6-1.8]                                                        | 19,9 [9.6-27.3]<br>1,7 [0.8-2.3]                                                    | 31,0 [19.5-42.0]<br>2,6 [1.6-3.5]                               | 1,8 [1.1-2.4]                                      | 331 755<br>[212 458-460 177]                                | 29% [11-56] |
|                                           | <b>Bi-TT<sup>2</sup>→Anti-PD1</b>             | 18,6 [13.3-25.4]<br>1,5 [1.1-2.1]                                                       | 11,7 [5.6-16.8]<br>1,0 [0.5-1.4]                                                    | 30,2 [22.6-37.0]<br>2,5 [1.9-3.1]                               | 1,9 [1.4-2.3]                                      | 359 067<br>[273 022-446 768]                                | 26% [13-43] |
|                                           | <b>Anti-PD1→ Bi-TT<sup>2</sup></b>            | 14,1 [5.6-21.5]<br>1,2 [0.5-1.8]                                                        | 21,3 [10.0-33.7]<br>1,8 [0.8-2.8]                                                   | 35,5 [21.4-45.8]<br>3,0 [1.8-3.8]                               | 2,3 [1.4-3.0]                                      | 364 497<br>[217 350-476 339]                                | 39% [14-70] |
|                                           | <b>IPI+NIVO→ Bi-TT<sup>2</sup></b>            | 9,2 [4.4-14.8]<br>0,8 [0.4-1.2]                                                         | 18,1 [9.8-28.0]<br>1,5 [0.8-2.3]                                                    | 27,3 [17.5-37.3]<br>2,3 [1.5-3.1]                               | 1,6 [1.0-2.2]                                      | 461 595<br>[293 897-626 081]                                | 25% [11-47] |
| <b>BRAF wild-<br/>type<br/>Population</b> | <b>Chemotherapy</b>                           | 3,9 [2.1-6.4]<br>0,3 [0.2-0.5]                                                          | 13,0 [7.1-20.1]<br>1,1 [0.6-1.7]                                                    | 16,9 [10.9-24.4]<br>1,4 [0.9-2.0]                               | 0,9 [0.6-1.3]                                      | 123 932<br>[76 828-182 857]                                 | 11% [4-25]  |
|                                           | <b>Anti-PD1</b>                               | 12,0 [9.5-15.4]<br>1,0 [0.8-1.3]                                                        | 6,5 [4.0-8.6]<br>0,5 [0.3-0.7]                                                      | 18,5 [15.1-22.4]<br>1,5 [1.3-1.9]                               | 1,1 [0.9-1.3]                                      | 146 156<br>[118 664-175 638]                                | 11% [7-18]  |
|                                           | <b>Ipilimumab</b>                             | 5,8 [3.9-8.1]<br>0,5 [0.3-0.7]                                                          | 14,2 [8.4-19.7]<br>1,2 [0.7-1.6]                                                    | 20,0 [14.1-25.3]<br>1,7 [1.2-2.1]                               | 1,2 [0.8-1.5]                                      | 171 109<br>[126 278-211 202]                                | 15% [7-26]  |
|                                           | <b>Ipi + Nivo</b>                             | 18,0 [10.5-24.8]<br>1,5 [0.9-2.1]                                                       | 4,6 [2.2-8.5]<br>0,4 [0.2-0.7]                                                      | 22,5 [14.9-29.6]<br>1,9 [1.2-2.5]                               | 1,4 [0.9-1.8]                                      | 298 803<br>[196 880-391 788]                                | 16% [7-29]  |

<sup>1</sup>Mono-TT=Mono-targeted therapy, <sup>2</sup>Bi-TT=Bi-targeted therapy, CI= Confidence Interval, <sup>3</sup>QALY= Quality adjusted life year

**Table S6: Extrapolated life expectancy and cost per patient from the multistate model (MSM) at 15 years**

|                                           | Sequence                                      | Mean time spent<br>in 1 <sup>st</sup> line<br>([CI <sub>95%</sub> ], (month,<br>years)) | Mean time spent<br>in subsequent lines<br>([CI <sub>95%</sub> ], (month,<br>years)) | Mean survival time<br>([CI <sub>95%</sub> ], (month,<br>years)) | Mean<br>QALYs <sup>3</sup><br>[CI <sub>95%</sub> ] | Mean total cost<br>per patient<br>[CI <sub>95%</sub> ], (€) |
|-------------------------------------------|-----------------------------------------------|-----------------------------------------------------------------------------------------|-------------------------------------------------------------------------------------|-----------------------------------------------------------------|----------------------------------------------------|-------------------------------------------------------------|
| <b>BRAF-<br/>mutated<br/>Population</b>   | <b>Mono-TT<sup>1</sup> → Anti-PD1</b>         | 23,1 [13.0-42.7]<br>1,9 [1.1-3.6]                                                       | 22,5 [7.1-45.9]<br>1,9 [0.6-3.8]                                                    | 45,6 [27.5-76.7]<br>3,8 [2.3-6.4]                               | 2,8 [1.7-4.7]                                      | 425 674<br>[255 293-718 525]                                |
|                                           | <b>Mono-TT<sup>1</sup>→ Bi-TT<sup>2</sup></b> | 12,8 [6.9-27.1]<br>1,1 [0.6-2.3]                                                        | 33,2 [13.4-56.7]<br>2,8 [1.1-4.7]                                                   | 46,0 [24.0-74.8]<br>3,8 [2.0-6.2]                               | 2,6 [1.4-4.3]                                      | 481 282<br>[258 297-781 441]                                |
|                                           | <b>Bi-TT<sup>2</sup>→Anti-PD1</b>             | 21,7 [14.4-34.8]<br>1,8 [1.2-2.9]                                                       | 19,8 [8.0-32.6]<br>1,7 [0.7-2.7]                                                    | 41,5 [27.1-59.0]<br>3,5 [2.3-4.9]                               | 2,6 [1.7-3.7]                                      | 476 134<br>[324 434-678 893]                                |
|                                           | <b>Anti-PD1→ Bi-TT<sup>2</sup></b>            | 16,5 [5.6-27.3]<br>1,4 [0.5-2.2]                                                        | 39,2 [14.9-76.7]<br>3,3 [1.2-6.4]                                                   | 55,7 [27.8-91.3]<br>4,6 [2.3-7.6]                               | 3,7 [1.8-6.1]                                      | 589 511<br>[283 308-998 899]                                |
|                                           | <b>IPI+NIVO→ Bi-TT<sup>2</sup></b>            | 9,7 [4.5-17.0]<br>0,8 [0.4-1.4]                                                         | 29,7 [14.5-54.2]<br>2,5 [1.2-4.5]                                                   | 39,4 [22.4-65.0]<br>3,3 [1.9-5.4]                               | 2,3 [1.3-3.8]                                      | 601 745<br>[362 953-919 625]                                |
| <b>BRAF wild-<br/>Type<br/>Population</b> | <b>Chemotherapy</b>                           | 4,1 [2.2-6.9]<br>0,3 [0.2-0.6]                                                          | 17,7 [8.3-30.6]<br>1,5 [0.7-2.6]                                                    | 21,9 [12.4-34.7]<br>1,8 [1.0-2.9]                               | 1,2 [0.7-1.9]                                      | 163 284<br>[86 085-267 023]                                 |
|                                           | <b>Anti-PD1</b>                               | 14,2 [10.8-19.1]<br>1,2 [0.9-1.6]                                                       | 9,3 [5.1-13.4]<br>0,8 [0.4-1.1]                                                     | 23,5 [17.4-29.5]<br>2,0 [1.5-2.5]                               | 1,4 [1.0-1.7]                                      | 186 435<br>[138 048-233 660]                                |
|                                           | <b>Ipilimumab</b>                             | 5,9 [4.0-8.7]<br>0,5 [0.3-0.7]                                                          | 20,2 [10.4-30.4]<br>1,7 [0.9-2.5]                                                   | 26,0 [16.4-36.2]<br>2,2 [1.4-3.0]                               | 1,5 [1.0-2.1]                                      | 203 528<br>[143 342-265 906]                                |
|                                           | <b>Ipi + Nivo</b>                             | 22,9 [11.8-35.4]<br>1,9 [1.0-2.9]                                                       | 5,9 [2.7-13.7]<br>0,5 [0.2-1.1]                                                     | 28,8 [17.6-43.2]<br>2,4 [1.5-3.6]                               | 1,8 [1.1-2.6]                                      | 381 807<br>[238 165-571 985]                                |

<sup>1</sup>Mono-TT=Mono-targeted therapy, <sup>2</sup>Bi-TT=Bi-targeted therapy, CI= Confidence Interval, <sup>3</sup>QALY= Quality adjusted life years

**Table S7: Extrapolated life expectancy and cost per patient from the multistate model (MSM) with a discount rate set at 0%**

|                                           | Sequence                                      | Mean time spent<br>in 1 <sup>st</sup> line<br>([CI <sub>95%</sub> ], (month,<br>years)) | Mean time spent<br>in subsequent lines<br>([CI <sub>95%</sub> ], (month,<br>years)) | Mean survival time<br>([CI <sub>95%</sub> ], (month,<br>years)) | Mean<br>QALYs <sup>3</sup><br>[CI <sub>95%</sub> ] | Mean total cost<br>per patient<br>[CI <sub>95%</sub> ], (€) |
|-------------------------------------------|-----------------------------------------------|-----------------------------------------------------------------------------------------|-------------------------------------------------------------------------------------|-----------------------------------------------------------------|----------------------------------------------------|-------------------------------------------------------------|
| <b>BRAF-<br/>mutated<br/>Population</b>   | <b>Mono-TT<sup>1</sup> → Anti-PD1</b>         | 23,3 [13.9-43.6]<br>1,9 [1.2-3.6]                                                       | 22,1 [7.9-44.8]<br>1,8 [0.7-3.7]                                                    | 45,4 [28.6-75.6]<br>3,8 [2.4-6.3]                               | 2,8 [1.8-4.7]                                      | 423 807<br>[263 409-705 367]                                |
|                                           | <b>Mono-TT<sup>1</sup>→ Bi-TT<sup>2</sup></b> | 12,8 [7.2-28.3]<br>1,1 [0.6-2.4]                                                        | 34,2 [13.8-54.0]<br>2,8 [1.2-4.5]                                                   | 47,0 [25.2-72.6]<br>3,9 [2.1-6.0]                               | 2,7 [1.4-4.2]                                      | 491 321<br>[267 755-767 535]                                |
|                                           | <b>Bi-TT<sup>2</sup>→Anti-PD1</b>             | 23,4 [15.0-35.7]<br>2,0 [1.2-3.0]                                                       | 19,8 [8.3-31.3]<br>1,6 [0.7-2.6]                                                    | 43,2 [28.6-59.3]<br>3,6 [2.4-4.9]                               | 2,7 [1.8-3.7]                                      | 498 928<br>[342 620-693 808]                                |
|                                           | <b>Anti-PD1→ Bi-TT<sup>2</sup></b>            | 16,7 [5.8-28.5]<br>1,4 [0.5-2.4]                                                        | 38,0 [15.4-71.7]<br>3,2 [1.3-6.0]                                                   | 54,8 [28.4-86.8]<br>4,6 [2.4-7.2]                               | 3,6 [1.9-5.8]                                      | 577 664<br>[292 432-936 186]                                |
|                                           | <b>IPI+NIVO→ Bi-TT<sup>2</sup></b>            | 10,2 [4.5-17.8]<br>0,8 [0.4-1.5]                                                        | 29,7 [14.9-53.0]<br>2,5 [1.2-4.4]                                                   | 39,9 [22.8-63.7]<br>3,3 [1.9-5.3]                               | 2,3 [1.3-3.7]                                      | 616 427<br>[372 412-915 269]                                |
| <b>BRAF Wild-<br/>Type<br/>Population</b> | <b>Chemotherapy</b>                           | 4,2 [2.2-7.1]<br>0,4 [0.2-0.6]                                                          | 18,3 [8.7-31.1]<br>1,5 [0.7-2.6]                                                    | 22,5 [12.7-35.2]<br>1,9 [1.1-2.9]                               | 1,2 [0.7-1.9]                                      | 168 043<br>[90 235-273 329]                                 |
|                                           | <b>Anti-PD1</b>                               | 15,9 [11.3-19.6]<br>1,3 [0.9-1.6]                                                       | 9,1 [5.4-13.9]<br>0,8 [0.5-1.2]                                                     | 25,0 [18.5-30.6]<br>2,1 [1.5-2.5]                               | 1,5 [1.1-1.8]                                      | 197 155<br>[145 058-243 952]                                |
|                                           | <b>Ipilimumab</b>                             | 5,7 [4.0-9.1]<br>0,5 [0.3-0.8]                                                          | 21,0 [11.0-31.4]<br>1,7 [0.9-2.6]                                                   | 26,7 [17.2-37.2]<br>2,2 [1.4-3.1]                               | 1,6 [1.0-2.2]                                      | 205 639<br>[1466 996-272 755]                               |
|                                           | <b>Ipi + Nivo</b>                             | 23,4 [12.4-36.0]<br>2,0 [1.0-3.0]                                                       | 6,0 [2.9-14.0]<br>0,5 [0.2-1.2]                                                     | 29,4 [17.9-44.0]<br>2,4 [1.5-3.7]                               | 1,8 [1.1-2.7]                                      | 389 178<br>[243 483-587 907]                                |

<sup>1</sup>Mono-TT=Mono-targeted therapy, <sup>2</sup>Bi-TT=Bi-targeted therapy, CI= Confidence Interval, <sup>3</sup>QALY= Quality adjusted life years
